# Supplementary material for: Characterization of the Human SNM1A and SNM1B/Apollo DNA Repair Exonucleases
Source: PubMed Central journal article supplement — J Biol Chem. 2012 Jun 11;287(31):26254–67. doi: 10.1074/jbc.M112.367243 (PMC3406710; doi:10.1074/jbc.m112.367243), 2012-06-11
Supplement: supp_M112.367243_jbc.M112.367243-1.pdf [file supp_M112.367243_jbc.M112.367243-1.pdf]

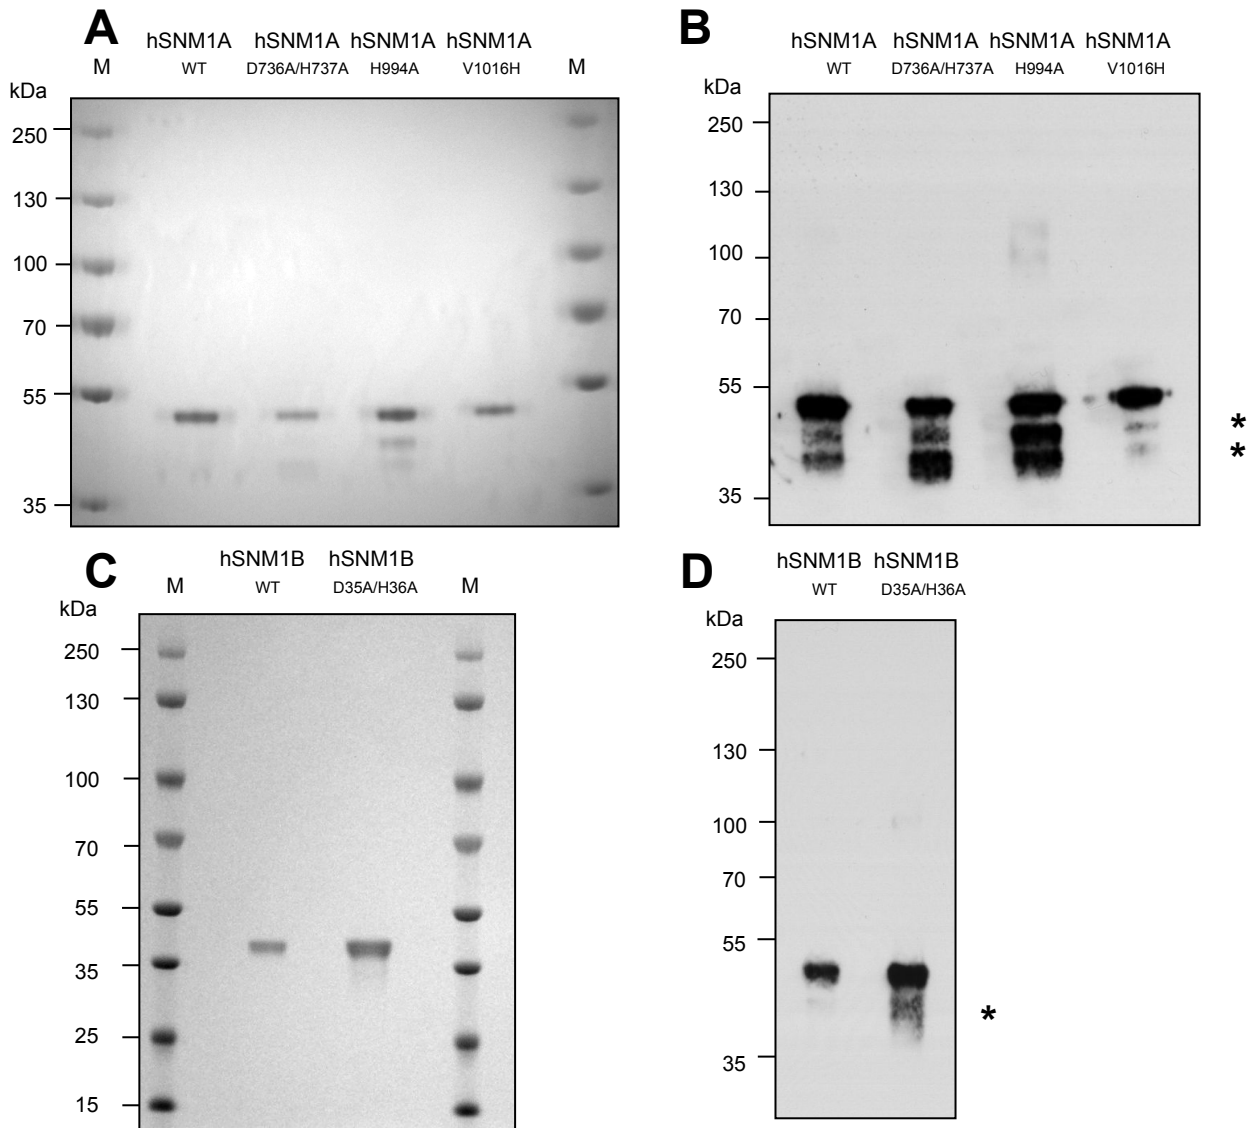

**Supplementary Figure S1.** (A) InstantBlue stained PAGE gel and (B) immunoblot (Abcam anti-hSNM1A antibody, cat. number ab14805, used at 1:1000) of the different preparations of hSNM1A used in this study, specifically hSNM1A WT, hSNM1A-D736A/H737A, hSNM1A-H994A and hSNM1A-V1016H. Lane (M) PageRuler Plus Prestained protein ladder (Fermentas). (C) InstantBlue stained PAGE gel and (D) immunoblot (Abgent anti-hSNM1B antibody, cat. number ap5426c, used at 1:500) of the different preparations of hSNM1B used in this study, specifically hSNM1B WT and hSNM1B-D35A/H36A. Lane (M) PageRuler Plus Prestained protein ladder (Fermentas). Presumed degradation products are marked with an asterisk.

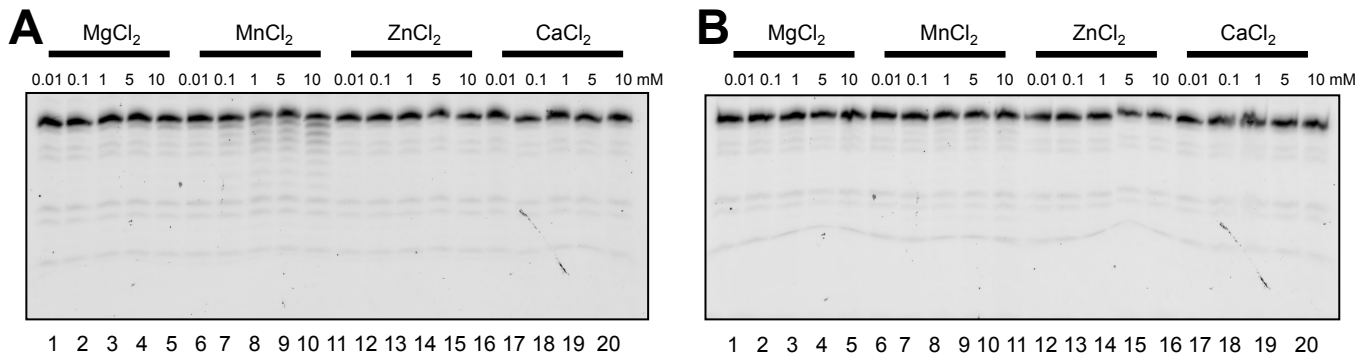

**Supplementary Figure S2.** Hydrolysis of dsDNA by hSNM1A-D736A/H737A and hSNM1B-D35A/H36A active site mutants in the presence of a variety of divalent metal ion cofactors, which is significantly reduced compared to wild-type proteins. (A-B) The extent of hydrolysis in 30 minutes after addition of (A) hSNM1A-D736A/H737A (0.002  $\mu$ g), or (B) hSNM1B-D35A/H36A (0.02  $\mu$ g) to 1000 nM 3' fluorescently labelled dsDNA in the presence of 0.01, 0.1, 1, 5 or 10 mM MgCl<sub>2</sub> (lanes 1-5), 0.01, 0.1, 1, 5 or 10 mM MnCl<sub>2</sub> (lanes 6-10), 0.01, 0.1, 1, 5 or 10 mM ZnCl<sub>2</sub> (lanes 11-15), or 0.01, 0.1, 1, 5 or 10 mM CaCl<sub>2</sub> (lanes 16-20).

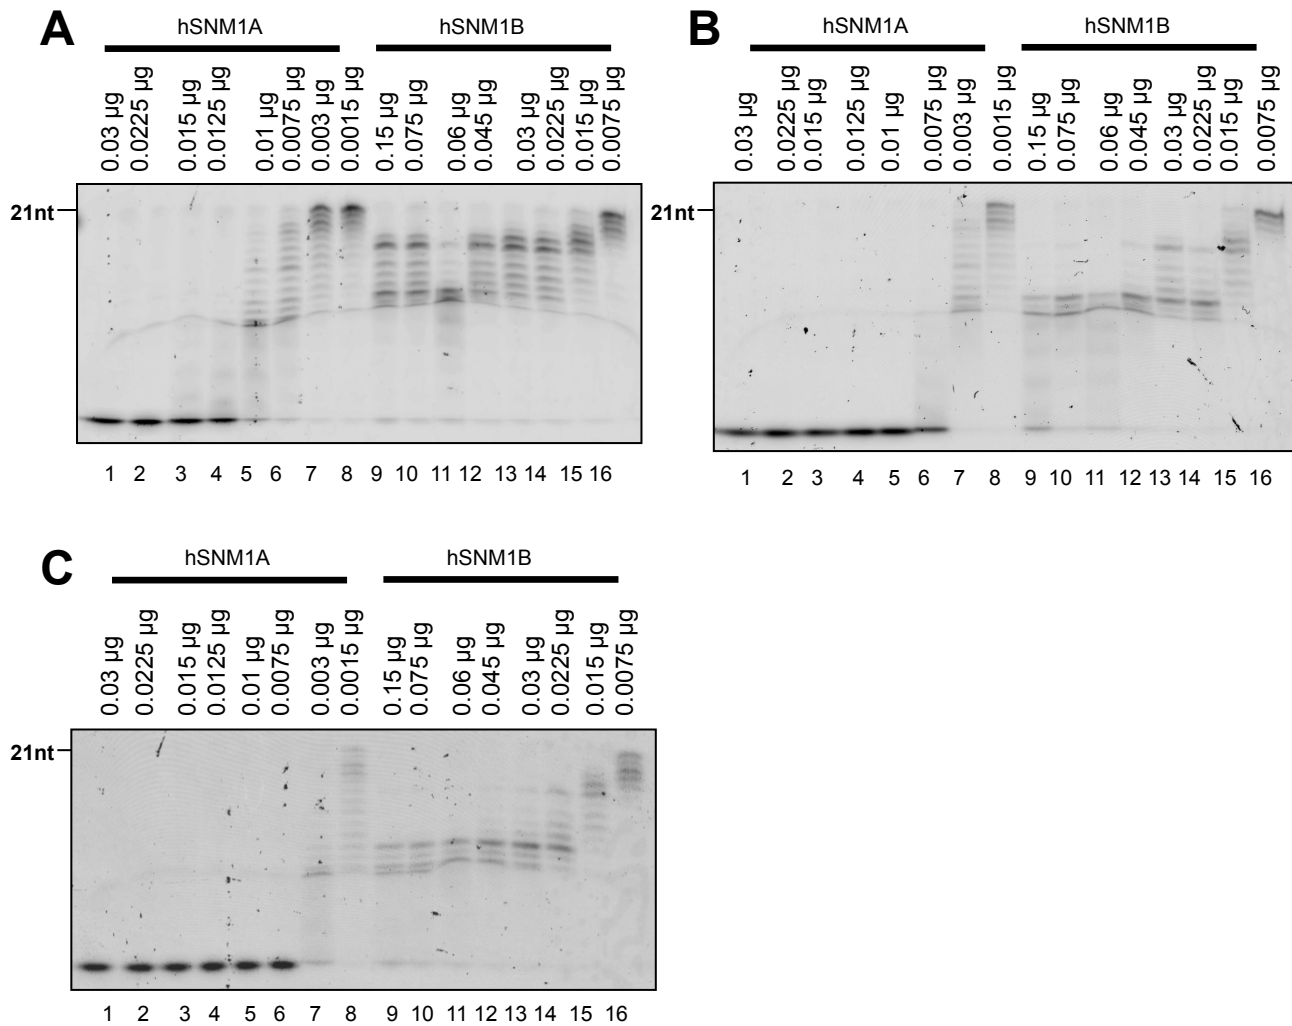

**Supplementary Figure S3.** Normalizing hSNM1A and hSNM1B activity on dsDNA using (A) 1000 nM, (B) 250 nM or (C) 100 nM substrate. Hydrolysis (30 min) of 1000 nM 3' fluorescein-labelled dsDNA in 10  $\mu$ L in the presence of 0.03-0.0015  $\mu$ g hSNM1A (lanes 1-8) or 0.15-0.0075  $\mu$ g hSNM1B (lanes 9-16). The amount of protein present in the reactions was 0.03  $\mu$ g (1), 0.0225  $\mu$ g (2), 0.015  $\mu$ g (3), 0.0125  $\mu$ g (4), 0.01  $\mu$ g (5), 0.0075  $\mu$ g (6), 0.003  $\mu$ g (7), 0.0015  $\mu$ g (8) hSNM1A or 0.15  $\mu$ g (9), 0.075  $\mu$ g (10), 0.06  $\mu$ g (11), 0.045  $\mu$ g (12), 0.03  $\mu$ g (13), 0.0225  $\mu$ g (14), 0.015  $\mu$ g (15), 0.0075  $\mu$ g (16) hSNM1B.

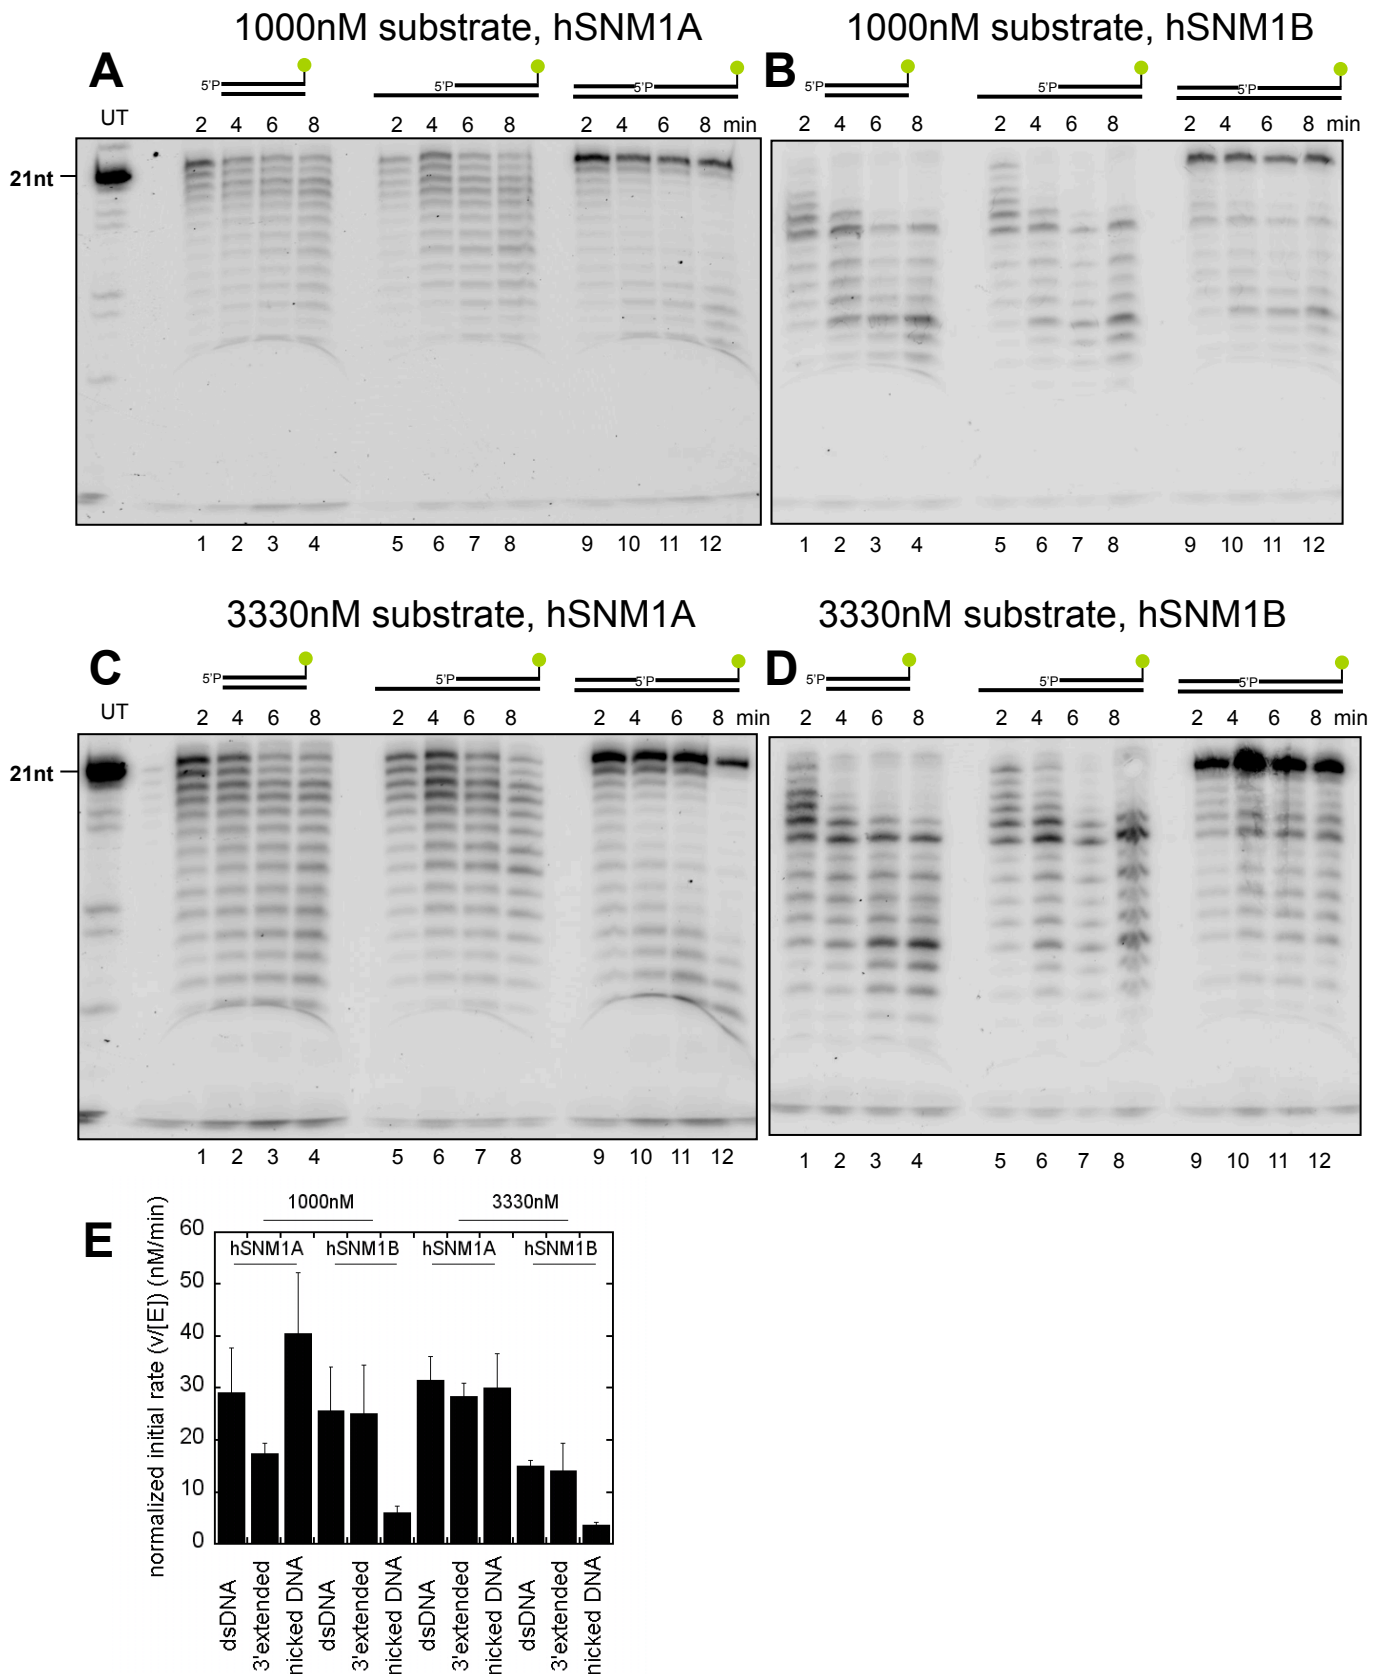

**Supplementary Figure S4.** Substrate preference of hSNM1A and hSNM1B in the context of a variety of oligonucleotide (low molecular weight) substrates. (A-D) Timecourses of the hydrolysis of 1000nM substrate by hSNM1A (A) or hSNM1B (B) and of 3330nM substrate by hSNM1A (C) or hSNM1B (D), using varying oligonucleotide substrates: blunt-ended (lanes 1-4, hydrolysis after 2,4,6,8 min), recessed (lanes 5-8, hydrolysis after 2,4,6,8 min) and nicked (lanes 9-12, hydrolysis after 2,4,6,8 min) dsDNA. Lane (UT) sample of untreated 3'-fluorescein-containing 21mer DNA. Gels are representative of multiple experiments, which show qualitatively equivalent results, and the results are quantified in panel (E).

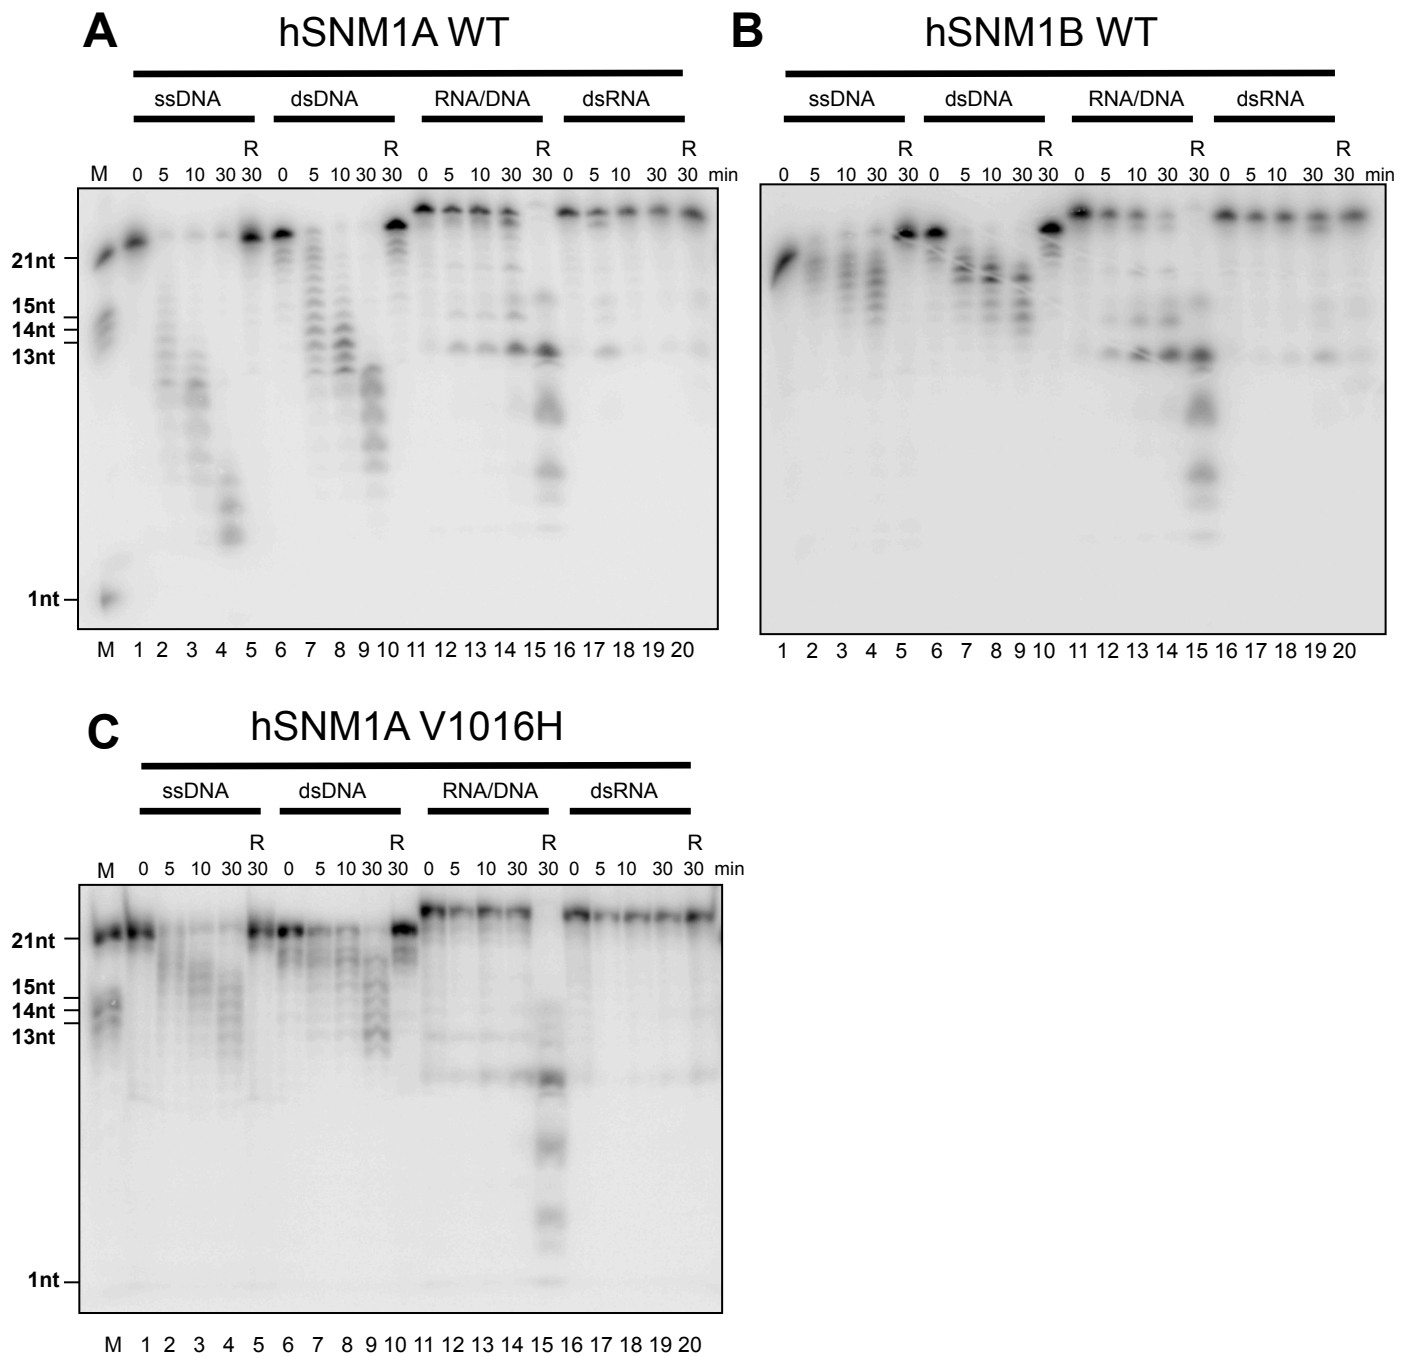

**Supplementary Figure S5.** hSNM1A and hSNM1B both show a preference for DNA over RNA hydrolysis. This specificity remains unchanged in the V1016H mutant of hSNM1A. Lane (M) 3'-labelled marker oligonucleotides of the size indicated. Timecourses (0, 5, 10, 30 minutes) of the hydrolysis reaction, by hSNM1A (A), hSNM1B (B) or hSNM1A-V1016H (C), on ssDNA (lanes 1-4), dsDNA, (lanes 6-9), RNA-DNA hybrid (lanes 11-14) or dsRNA (lanes 16-19). A control reaction with RNase H (30 min, 0.2 U, Promega) is shown with ssDNA (lane 5), dsDNA, (lane 10), RNA-DNA hybrid (lane 15) and dsRNA (lane 20). Reactions were carried out in 10  $\mu$ L, with 100 nM 3'-labelled ( $\alpha$ - $^{32}$ P-dATP) substrate and either 0.002  $\mu$ g wild-type hSNM1A, 0.02  $\mu$ g hSNM1B or 0.001  $\mu$ g hSNM1A-V1016H. Gels are representative of multiple experiments, which show qualitatively equivalent results.

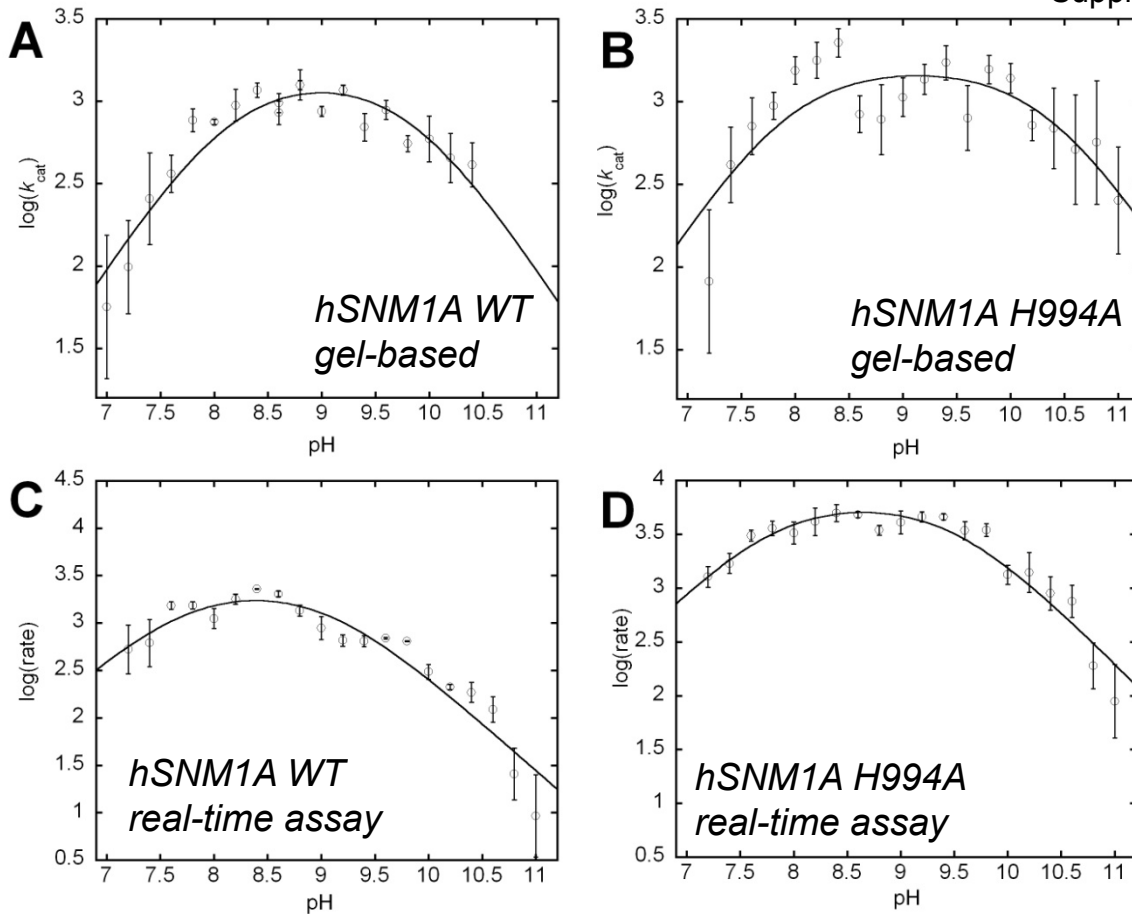

| Measurement method                   | WT hSNM1A                 | H994A hSNM1A               |
|--------------------------------------|---------------------------|----------------------------|
| Gel-based (dsDNA)                    | $pK_{a1} = 8.15 \pm 0.12$ | $pK_{a1} = 7.94 \pm 0.20$  |
|                                      | $pK_{a2} = 9.84 \pm 0.15$ | $pK_{a2} = 10.32 \pm 0.21$ |
| Real-time fluorescence based (ssDNA) | $pK_{a1} = 7.72 \pm 0.30$ | $pK_{a1} = 7.81 \pm 0.18$  |
|                                      | $pK_{a2} = 9.06 \pm 0.19$ | $pK_{a2} = 9.49 \pm 0.12$  |

**Supplementary figure S6: Mutation of histidine-994 in hSNM1A does not significantly alter the pH-rate profile of the dsDNA hydrolysis reaction.** A logarithmic plot of an estimate of  $k_{\text{cat}}$  for wild-type (A) and H994A (B) hSNM1A as it varies with pH. The value of  $k_{\text{cat}}$  was estimated as the normalized initial reaction rate ( $v/[E]$ ) at 1000 nM dsDNA, a point at which the Michaelis-Menten curve in Figure 3A is saturated. Values were measured in at least triplicate and the standard error was calculated. The normalized reaction rate ( $v/[E]$ ) for hydrolysis of 1000nM ssDNA was also measured using the real-time assay (Figure 5) and is shown as a logarithmic plot of the initial reaction rate (increase in fluorescence per minute per nM enzyme) for wild-type (C) and H994A (D) hSNM1A. All plots were fitted to the double ionization model with enzyme-substrate active in singly-ionized form (equation 2) to obtain values of  $pK_{a1}$  and  $pK_{a2}$  as summarized in the inset table.

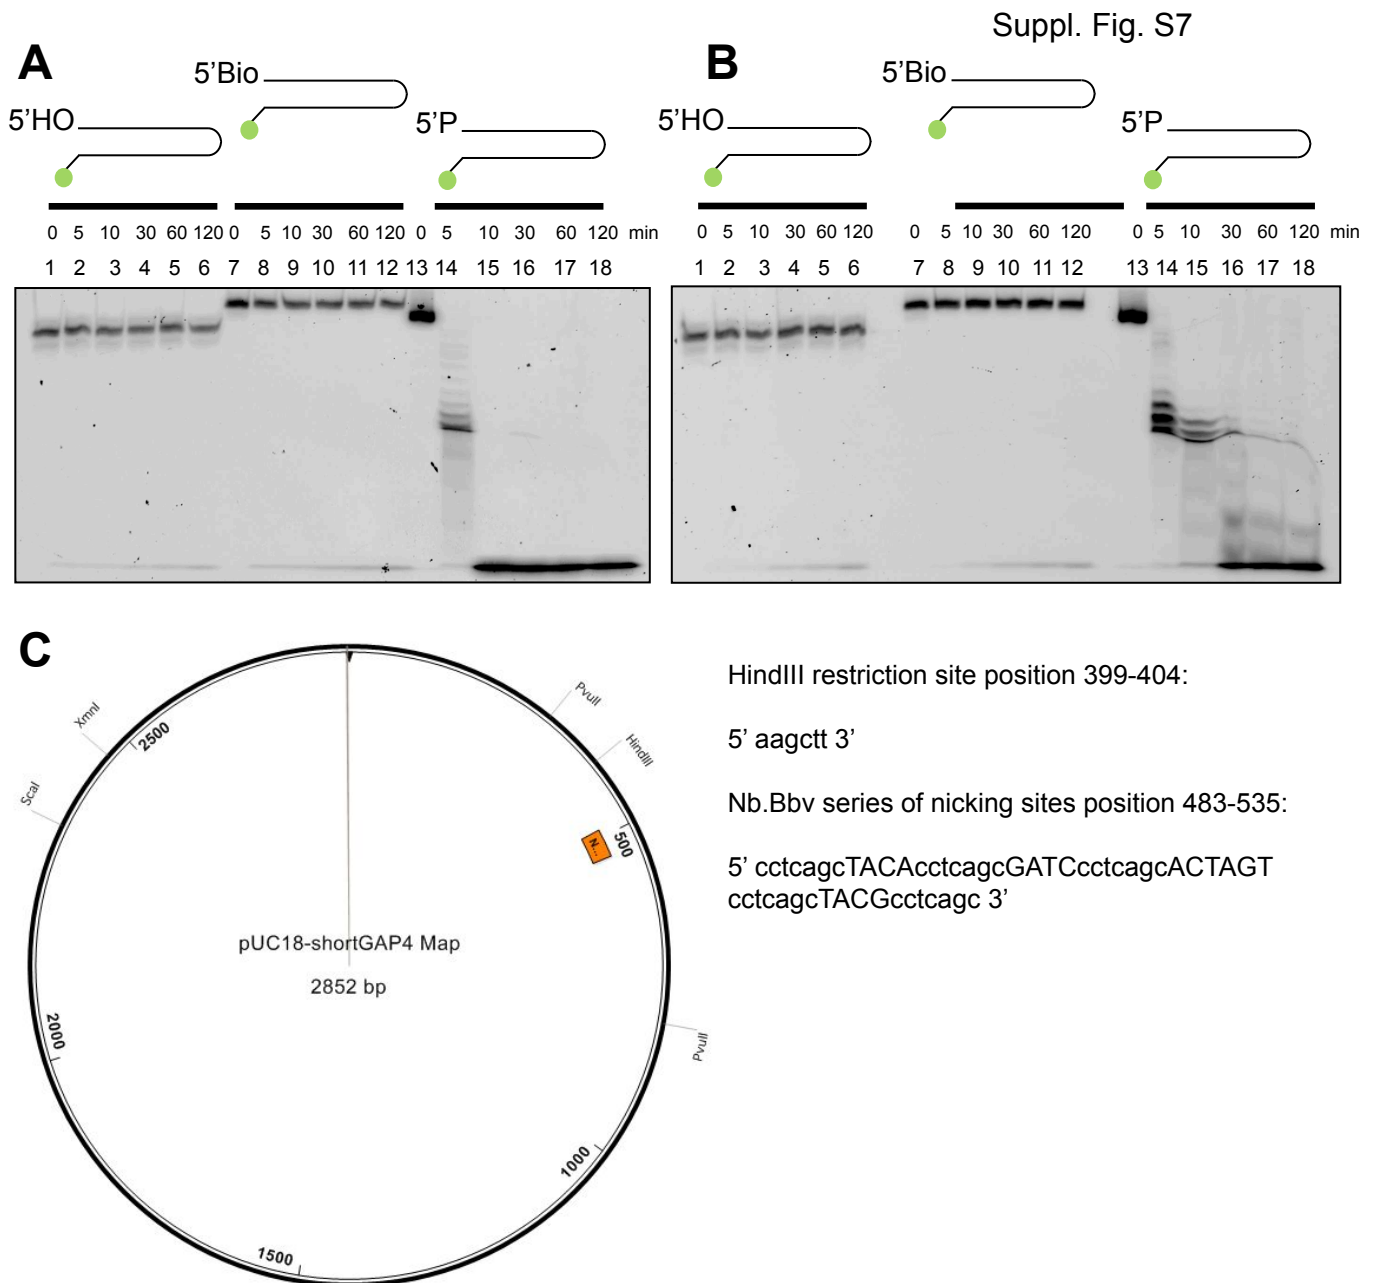

**Supplementary Figure S7.** Neither hSNM1A nor hSNM1B exhibit hairpin opening endonucleolytic activity. Timecourses (0, 5, 10, 30, 60, 120 minutes) of the hydrolysis reaction, by hSNM1A (A) or hSNM1B (B), on 5'-OH hairpin (lanes 1-6), 5'-biotin hairpin (lanes 7-12), or 5'-phosphate hairpin (lanes 13-18) substrates. Reactions were carried out in 50  $\mu$ L, with 1000 nM 3'-fluorescein containing substrate and either 0.01  $\mu$ g (per 10  $\mu$ L reaction) hSNM1A or 0.1  $\mu$ g (per 10  $\mu$ L reaction) hSNM1B. Gels are representative of multiple experiments, which show qualitatively equivalent results. (C) Map of the modified pUC18 plasmid used to carry out the experiments shown in Figure 4A-B, indicating the position of the HindIII and Nb.BbvCI restriction sites, marked with HindIII and N... respectively.

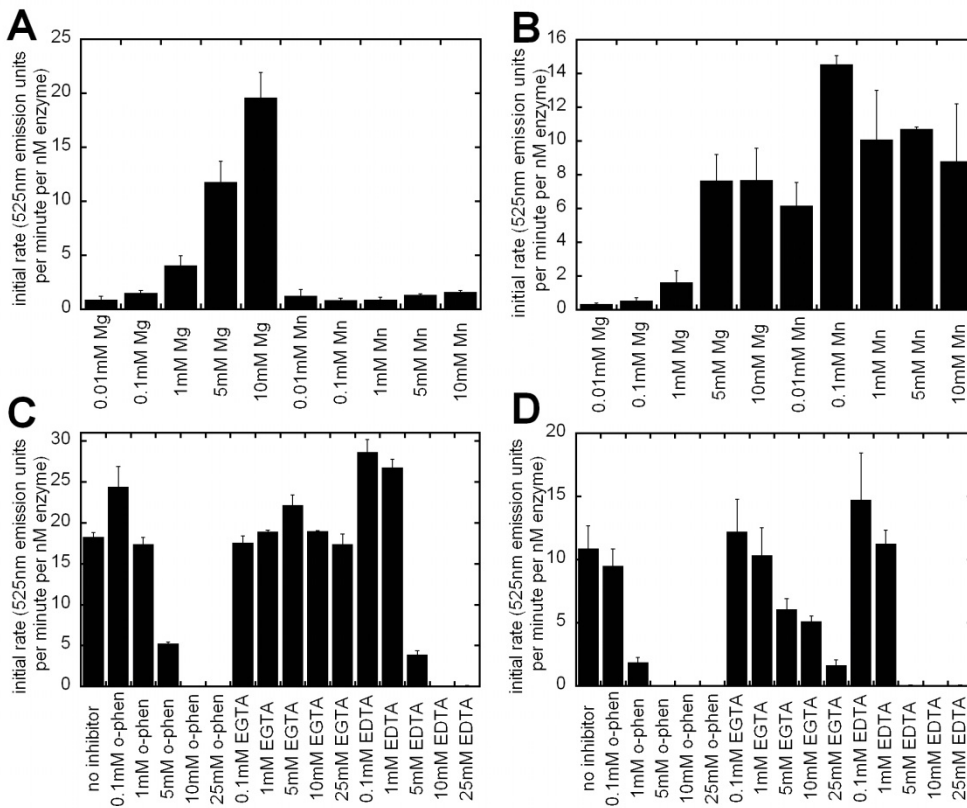

**Supplementary figure S8:** (A,B,C,D) Increase in fluorescence varies with the dose of magnesium and manganese, and can be abrogated by the addition of metal chelators *o*-phenanthroline, EGTA or EDTA. (A,B) Initial normalized rate of reaction,  $v/[E]$  in fluorescence increase per minute per nM enzyme, when 1000nM ssDNA substrate was hydrolyzed by hSNM1A (A) or hSNM1B (B) in the presence of 0.01-10 mM  $MgCl_2$  or  $MnCl_2$ . (C,D) Initial rate of reaction when 1000nM ssDNA substrate was hydrolyzed by hSNM1A (C) or hSNM1B (D) in the presence of 10 mM  $MgCl_2$  and increasing amount of *o*-phenanthroline, EGTA or EDTA. Reactions were all carried out in 50 $\mu$ L volume, in 20 mM HEPES-KOH pH7.5, 50 mM KCl, 0.5 mM DTT, 10 mM  $MgCl_2$ , 0.05 % Triton-X, 0.1 mg/mL BSA, 5 % glycerol, with 0.007  $\mu$ g hSNM1A (or 0.015  $\mu$ g hSNM1B) per 10 $\mu$ L reaction. All measurements were made at least in duplicate and standard errors are represented by the error bars
